# Supplementary material
Source: PubMed Central journal article supplement (PMC9043981)
Supplement: mmc2.pdf [file mmc2.pdf]

**Table S1.** IC<sub>50</sub> (Figure 1B) of Convalescent, BNT162b2 and mRNA-1273 elicited antibodies against viruses with variant spike proteins. Age, Sex and Comorbidities are shown.

| <b>Convalescent</b>               |          |         |          |         |
|-----------------------------------|----------|---------|----------|---------|
| IC <sub>50</sub> (serum dilution) |          |         |          |         |
| donor                             | D614G    | Beta    | Delta    | Omicron |
| 1                                 | 311      | 64      | 134      | ND      |
| 2                                 | 239      | 47      | 156      | 16      |
| 3                                 | 151      | 50      | 40       | ND      |
| 4                                 | 145      | 2       | 101      | 21      |
| 5                                 | 61       | 36      | 97       | ND      |
| 6                                 | 249      | 130     | 111      | ND      |
| 7                                 | 409      | 119     | 156      | ND      |
| 8                                 | 243      | 43      | 53       | 39      |
| 9                                 | 217      | 6       | 46       | 5       |
| 10                                | 310      | 151     | 122      | ND      |
| Mean (SD)                         | 233 (94) | 65 (49) | 102 (41) | 9 (36)  |

| <b>BNT162b2</b> |                                |        |     |                           |                                   |           |           |         |
|-----------------|--------------------------------|--------|-----|---------------------------|-----------------------------------|-----------|-----------|---------|
| donor           | Days post 2 <sup>nd</sup> dose | Age    | Sex | Comorbidities             | IC <sub>50</sub> (serum dilution) |           |           |         |
|                 |                                |        |     |                           | D614G                             | Beta      | Delta     | Omicron |
| 1               | 84                             | 39     | F   | None                      | 910                               | 112       | 211       | 22      |
| 2               | 52                             | 23     | F   | None                      | 1573                              | 141       | 398       | 11      |
| 3               | 101                            | 26     | F   | Asthma                    | 1748                              | 463       | 266       | 118     |
| 4               | 109                            | 33     | F   | None                      | 1010                              | 300       | 642       | 18      |
| 5               | 60                             | 35     | F   | Hypothyroidism, Psoriasis | 330                               | 94        | 421       | 35      |
| 6               | 81                             | 42     | F   | Asthma                    | 452                               | 65        | 247       | ND      |
| 7               | 108                            | 26     | F   | None                      | 674                               | 195       | 124       | 5       |
| 8               | 107                            | 24     | M   | None                      | 548                               | 86        | 274       | 11      |
| 9               | 110                            | 35     | M   | None                      | 490                               | 96        | 338       | ND      |
| Mean (SD)       | 90 (22)                        | 31 (7) |     |                           | 859 (476)                         | 172 (123) | 325 (142) | 25 (36) |

**mRNA-1273**

| mRNA-1273 |                                |     |     |               |                                   |           |           |         |
|-----------|--------------------------------|-----|-----|---------------|-----------------------------------|-----------|-----------|---------|
| donor     | Days post 2 <sup>nd</sup> dose | Age | Sex | Comorbidities | IC <sub>50</sub> (serum dilution) |           |           |         |
|           |                                |     |     |               | D614G                             | Beta      | Delta     | Omicron |
| 1         | 89                             | 26  | M   | None          | 1530                              | 208       | 273       | 94      |
| 2         | 92                             | 53  | M   | None          | 1206                              | 59        | 567       | ND      |
| 3         | 61                             | 67  | M   | Prediabetes   | 1059                              | 110       | 246       | 34      |
| 4         | 93                             | 33  | F   | None          | 757                               | 147       | 541       | ND      |
| 5         | 44                             | 32  | M   | None          | 716                               | 137       | 259       | 93      |
| 6         | 100                            | 29  | F   | None          | 1124                              | 489       | 239       | ND      |
| 7         | 52                             | 33  | F   | None          | 1074                              | 49        | 336       | 42      |
| 8         | 105                            | 55  | F   | Asthma        | 523                               | 100       | 123       | 45      |
| Mean (SD) | 80 (24)                        | 41  |     |               | 999 (299)                         | 162 (132) | 323 (145) | 38 (36) |
