# Supplementary material
Source: PubMed Central journal article supplement (PMC9043981)
Supplement: mmc3.pdf [file mmc3.pdf]

Table S2. IC50 (Figure 1C and D) of BNT162b2 elicited antibodies against viruses with variant spike proteins. Sera were collected from COVID-19 unexperienced and experienced donors. Age, Sex and Comorbidities are shown.

| BNT162b2 (Naive) |        |     |                                  |                 |                    |                      |                      |                 |                    |                      |                      |                 |                    |                      |                      |                 |                    |                      |                      |
|------------------|--------|-----|----------------------------------|-----------------|--------------------|----------------------|----------------------|-----------------|--------------------|----------------------|----------------------|-----------------|--------------------|----------------------|----------------------|-----------------|--------------------|----------------------|----------------------|
| Donor            | Age    | Sex | Comorbidities                    | D614G           |                    |                      |                      | Beta            |                    |                      |                      | Delta           |                    |                      |                      | Omicron         |                    |                      |                      |
|                  |        |     |                                  | Pre-vaccination | 1 month post vax-2 | 7-8 month post vax-2 | 1 month post booster | Pre-vaccination | 1 month post vax-2 | 7-8 month post vax-2 | 1 month post booster | Pre-vaccination | 1 month post vax-2 | 7-8 month post vax-2 | 1 month post booster | Pre-vaccination | 1 month post vax-2 | 7-8 month post vax-2 | 1 month post booster |
| 1                | 34     | M   | None                             | ND              | 1074               | 165                  | 4672                 | ND              | 227                | 97                   | 733                  | ND              | 187                | 221                  | 1060                 | ND              | 27                 | 1                    | 300                  |
| 2                | 29     | F   | None                             | ND              | 564                | 319                  | 3561                 | ND              | 296                | 180                  | 1344                 | ND              | 309                | 250                  | 3641                 | ND              | 98                 | 54                   | 347                  |
| 3                | 37     | F   | Allergy                          | ND              | 624                | 283                  | 4203                 | ND              | 410                | 294                  | 1359                 | ND              | 801                | 462                  | 4867                 | ND              | 155                | 63                   | 169                  |
| 4                | 62     | M   | Hypertension, Hyperlipidemia     | ND              | 368                | 185                  | 3361                 | ND              | 320                | 158                  | 2789                 | ND              | 541                | 325                  | 5654                 | ND              | 35                 | 15                   | 525                  |
| 5                | 39     | M   | None                             | ND              | 1413               | 1096                 |                      | ND              | 158                | 193                  |                      | ND              | 720                | 579                  |                      | ND              | 7                  | ND                   |                      |
| 6                | 37     | F   | None                             | ND              | 2538               | 406                  |                      | ND              | 499                | 347                  |                      | ND              | 1668               | 596                  |                      | ND              | 20                 | 185                  |                      |
| 7                | 52     | F   | Hypertension                     | ND              | 1542               | 852                  | 8063                 | ND              | 285                | 235                  | 3986                 | ND              | 908                | 470                  | 3152                 | ND              | ND                 | ND                   | 363                  |
| 8                | 34     | M   | Hypothyroidism                   | ND              | 534                | 535                  | 3141                 | ND              | 686                | 397                  | 1569                 | ND              | 926                | 230                  | 3796                 | ND              | 57                 | 76                   | 366                  |
| 9                | 43     | M   | None                             | ND              | 2480               | 179                  |                      | ND              | 404                | 254                  |                      | ND              | 746                | 879                  |                      | ND              | 30                 | 56                   |                      |
| 10               | 38     | F   | Asthma, Anemia, Tinea versicolor | ND              | 748                | 238                  | 7492                 | ND              | 184                | 124                  | 920                  | ND              | 770                | 631                  | 4976                 | ND              | 56                 | 76                   | 506                  |
| 11               | 38     | M   | None                             | ND              | 202                | 1609                 | 737                  | ND              | 780                | 393                  | 1904                 | ND              | 1073               | 585                  | 6109                 | ND              | 83                 | 51                   | 391                  |
| 12               | 52     | F   | None                             | ND              | 1368               | 1520                 | 8796                 | ND              | 501                | 404                  | 2217                 | ND              | 1202               | 450                  | 4950                 | ND              | 159                | 106                  | 276                  |
| <b>Mean (SD)</b> | 41 (9) |     |                                  |                 | 1121 (743)         | 616 (505)            | 4892 (2517)          |                 | 396 (185)          | 256 (105)            | 1869 (959)           |                 | 821 (377)          | 473 (188)            | 4245 (1445)          |                 | 61 (51)            | 57 (50)              | 360 (104)            |

| BNT162b2 (Experienced) |         |     |                          |                 |                    |                      |                      |                 |                    |                      |                      |                 |                    |                      |                      |                 |                    |                      |                      |
|------------------------|---------|-----|--------------------------|-----------------|--------------------|----------------------|----------------------|-----------------|--------------------|----------------------|----------------------|-----------------|--------------------|----------------------|----------------------|-----------------|--------------------|----------------------|----------------------|
| Donor                  | Age     | Sex | Comorbidities            | D614G           |                    |                      |                      | Beta            |                    |                      |                      | Delta           |                    |                      |                      | Omicron         |                    |                      |                      |
|                        |         |     |                          | Pre-vaccination | 1 month post vax-2 | 7-8 month post vax-2 | 1 month post booster | Pre-vaccination | 1 month post vax-2 | 7-8 month post vax-2 | 1 month post booster | Pre-vaccination | 1 month post vax-2 | 7-8 month post vax-2 | 1 month post booster | Pre-vaccination | 1 month post vax-2 | 7-8 month post vax-2 | 1 month post booster |
| 1                      | 45      | M   | Asthma                   | 107             | 3046               | 1321                 | 19136                | 19              | 2994               | 2033                 | 17987                | 40              | 2460               | 1737                 | 15778                | ND              | 252                | 175                  | 1142                 |
| 2                      | 37      | F   | None                     | 32              | 2218               | 1885                 | 26367                | ND              | 2084               | 806                  | 20458                | 40              | 2842               | 2355                 | 15311                | ND              | 236                | 125                  | 1197                 |
| 3                      | 54      | F   | Hypertension, Obesity    | 41              | 6066               | 4301                 | 14407                | 28              | 2132               | 843                  | 7861                 | 31              | 2470               | 2100                 | 14807                | ND              | 167                | 104                  | 962                  |
| 4                      | 54      | M   | Cardiovascular disease   | 64              | 2137               | 1752                 | 7239                 | ND              | 845                | 1045                 | 5420                 | ND              | 1757               | 476                  | 11104                | 18              | 254                | 144                  | 922                  |
| 5                      | 25      | F   | None                     | 84              | 5849               | 4910                 | 14302                | 49              | 1814               | 853                  | 10805                | ND              | 2186               | 909                  | 8696                 | 14              | 39                 | ND                   | 293                  |
| 6                      | 42      | F   | Diabetes, Herpes simplex | 56              | 6493               | 4721                 | 11001                | 25              | 1517               | 1138                 | 6501                 | 96              | 3405               | 1058                 | 12103                | ND              | 190                | 111                  | 1354                 |
| 7                      | 43      | M   | None                     | 8               | 3895               | 4003                 | 11623                | ND              | 2811               | 835                  | 5640                 | ND              | 2185               | 1624                 | 24641                | ND              | 208                | 105                  | 579                  |
| <b>Mean (SD)</b>       | 43 (10) |     |                          | 56 (31)         | 4243 (1734)        | 3270 (1435)          | 14868 (5790)         | 30 (11)         | 2028 (683)         | 1079 (406)           | 10668 (5701)         | 52 (26)         | 2472 (490)         | 1465 (626)           | 14634 (4722)         | 16 (2)          | 192 (69)           | 109 (25)             | 921 (344)            |
